# Supplementary material
Source: PubMed Central journal article supplement (PMC3574189)
Supplement: NIHMS435115-supplement-1_si_001.pdf [file NIHMS435115-supplement-1_si_001.pdf]

## Figure S1: Alternate Conformations for Flap Residues

$F_o-F_c$  omit map (contoured at  $3.0 \sigma$ ) for the flap residues Gly48' - Gly52' in complex  $PR_{I54M}$ -inhibitor **1** and residues Gly48 - Gly52 in complexes of inhibitor **1** with  $PR_{R8Q}$ ,  $PR_{D30N}$ ,  $PR_{I50V}$  and  $PR_{V82A}$ . Carbon atoms are colored cyan and magenta for the major and minor conformation, respectively.

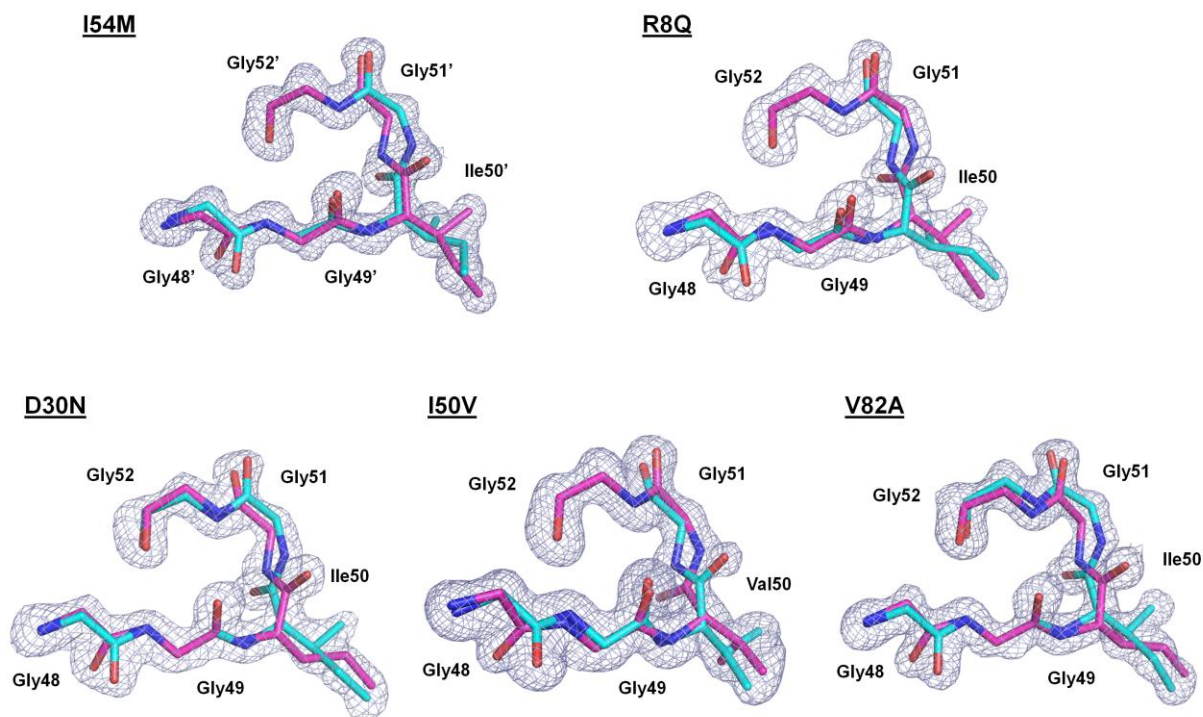

**Table S1. Hydrogen Bond Interactions between Protease and Inhibitor 1**

| PR atom               | Inhibitor atom       | Distance (Å)     |                   |                    |                    |                    |                    |
|-----------------------|----------------------|------------------|-------------------|--------------------|--------------------|--------------------|--------------------|
|                       |                      | PR <sub>WT</sub> | PR <sub>R8Q</sub> | PR <sub>D30N</sub> | PR <sub>I50V</sub> | PR <sub>I54M</sub> | PR <sub>V82A</sub> |
| Hydrogen Bonds        |                      |                  |                   |                    |                    |                    |                    |
| Asp25 OD1             | O18                  | 2.7              | 2.6               | 2.6                | 2.7                | 2.6                | 2.6                |
| Asp25 OD2             | O18                  | 2.4              | 2.6               | 2.4                | 3.2                | 2.5                | 2.6                |
| Asp25' OD1            | O18                  | 2.9              | 2.7               | 2.8                | 2.7                | 2.8                | 2.7                |
| Asp25' OD2            | O18                  | 3.3              | 3.0               | 3.2                | 2.6                | 3.3                | 3.1                |
| Gly27' O              | N20                  | 3.2              | 3.3               | 3.2                | 3.2                | 3.2                | 3.3                |
| Asp30' OD2/Asn30' ND2 | O26                  | 3.4              |                   | 3.1                |                    |                    |                    |
| Asp30' NH/Asn30' NH   | O26                  | 3.4              | 3.3               | 3.4                | 3.2                | 3.4                | 3.3                |
| Asp29' NH             | O26                  | 3.4              | 3.3               | 3.4                | 3.3                | 3.3                | 3.2                |
| Asp29' NH             | O28                  | 3.0              | 3.0               | 2.9                | 2.8                | 3.0                | 2.9                |
| Asp29' OD2            | O28                  | 3.5              | 3.5               | 3.5                | 3.5                | 3.5                | 3.4                |
| Asp29' OD2            | O41                  | 3.5              | 3.5               | 3.4                | 3.4                | 3.5                | 3.5                |
| H <sub>2</sub> O (D)  | O41                  | 3.2              | 3.4               | 3.2                | 3.3                | 3.3                | 3.3                |
| Asp29' OD1            | H <sub>2</sub> O (D) | 3.0              | 2.9               | 2.9                | 2.9                | 2.9                | 2.9                |
| Gly27' O              | H <sub>2</sub> O (D) | 2.8              | 2.8               | 2.9                | 2.8                | 2.8                | 2.8                |
| H <sub>2</sub> O (A)  | O10                  | 2.6              | 2.4               | 2.4                | 2.6                | 2.6                | 2.4                |
| H <sub>2</sub> O (A)  | O22                  | 2.9              | 3.2               | 3.1                | 3.0                | 3.0                | 3.1                |
| Ile50'/Val50' NH      | H <sub>2</sub> O (A) | 2.9              | 2.8               | 2.9                | 3.0                | 2.8                | 3.1                |
| Ile50/Val50 NH        | H <sub>2</sub> O (A) | 3.0              | 3.1               | 3.1                | 2.9                | 2.9                | 3.3                |
| Asp30 OD2/Asn30 ND2   | O39                  | 2.5              | 3.3               | -                  | 2.9                | 2.4                | 3.4                |
| Asp30 NH/Asn30 NH     | O39                  | 3.3              | 3.2               | 3.2                | 3.1                | 3.1                | 3.2                |

Distances are listed for the major conformation of inhibitor and PR residues. Interatomic distances of 3.4-3.5Å indicate weak hydrogen bonds.
